# Supplementary material for: SARS-CoV-2 Epidemics in Retirement and Nursing Homes in Italy: A New Preparedness Assessment Model after the First Epidemic Wave
Source: Int J Environ Res Public Health. 2021 May 26;18(11):5712. doi: 10.3390/ijerph18115712 (PMC8199425; doi:10.3390/ijerph18115712)
Supplement: Supplementary file 1 [file ijerph-18-05712-s001.zip › ijerph-1161370-S1.pdf]

**Table S1. Introductory questionnaire for the assessment of "Preparedness" in residential facilities for the elderly in the city of Sassari**

**General information**

Name of the facility: \_\_\_\_\_

Name of the facility manager: \_\_\_\_\_

Telephone number of the facility: \_\_\_\_\_

E-mail address of the facility: \_\_\_\_\_

Date of the survey: \_\_\_\_\_

**Information on the facility, residents and workers**

Total number of beds: \_\_\_\_\_

Total number of residential rooms: \_\_\_\_\_

Total number of residential single rooms: \_\_\_\_\_

Current number of residents: \_\_\_\_\_

Number of beds provided for isolation of COVID-19 cases according to facility plan: \_\_\_\_\_

Number of confirmed COVID-19 cases currently present among residents: \_\_\_\_\_

Number of beds provided for quarantine (new residents admissions; contacts of suspected/confirmed COVID-19 cases) according to facility plan: \_\_\_\_\_

Number of people working in the facility (employees and non-employees): \_\_\_\_\_

Number of Nurses among the staff in the facility: \_\_\_\_\_

Number of Healthcare assistants among the staff in the facility: \_\_\_\_\_

Number of confirmed COVID-19 cases currently present among facility staff: \_\_\_\_\_

**Procedures**

Are new residents housed in a dedicated room to avoid contact with other residents during the observation period (14 days)? ☐ Yes ☐ No

Are new residents tested for Covid19 at the time of admission and at the end of the observation period (14 days)? ☐ Yes ☐ No

|                                                                                                                                                    |                               |                              |
|----------------------------------------------------------------------------------------------------------------------------------------------------|-------------------------------|------------------------------|
| Is the facility staff informed that they should not come to work with fever, myalgia, profound asthenia, or respiratory/gastrointestinal symptoms? | <input type="checkbox"/>  Yes | <input type="checkbox"/>  No |
| Is a body temperature screening provided to all staff members prior to access to the facility?                                                     | <input type="checkbox"/>  Yes | <input type="checkbox"/>  No |
| Is Alcohol-based hand rubs (ABHR) available for anyone at the facility entrance?                                                                   | <input type="checkbox"/>  Yes | <input type="checkbox"/>  No |
| Does anyone entering the facility wear a surgical mask the whole time of the stay?                                                                 | <input type="checkbox"/>  Yes | <input type="checkbox"/>  No |
| Is the facility staff informed to avoid close contact with co-workers, except for any nursing activities that require it out?                      | <input type="checkbox"/>  Yes | <input type="checkbox"/>  No |
| Is there a procedure in place regarding limiting visits to residents by family members?                                                            | <input type="checkbox"/>  Yes | <input type="checkbox"/>  No |
| Is daily body temperature measurement provided to all facility residents?                                                                          | <input type="checkbox"/>  Yes | <input type="checkbox"/>  No |
| Is nursing staff instructed on the procedure to be followed when a new resident (from hospital/household) is admitted?                             | <input type="checkbox"/>  Yes | <input type="checkbox"/>  No |
| Is there a procedure for rapid isolation and notification to the referring physician of a new confirmed/suspected COVID-19 case?                   | <input type="checkbox"/>  Yes | <input type="checkbox"/>  No |
| Is there a provision for the transfer of the confirmed/suspected case to another facility if adequate isolation of the subject cannot be arranged? | <input type="checkbox"/>  Yes | <input type="checkbox"/>  No |
| Is nursing staff informed on the procedure to be taken in the event of a new confirmed/suspected COVID-19 case?                                    | <input type="checkbox"/>  Yes | <input type="checkbox"/>  No |
| Has a separate facility area been identified to be used if there is a high number of COVID-19 cases (cohort isolation)?                            | <input type="checkbox"/>  Yes | <input type="checkbox"/>  No |
| Has a staff member been identified in charge of proper use of PPE and proper hand hygiene by health care workers?                                  | <input type="checkbox"/>  Yes | <input type="checkbox"/>  No |
| Is ABHR present and readily available to all staff during care activities?                                                                         | <input type="checkbox"/>  Yes | <input type="checkbox"/>  No |
| Is periodic sanitization of workers' ancillary rooms performed?                                                                                    | <input type="checkbox"/>  Yes | <input type="checkbox"/>  No |
| Is there a person in charge of monitoring PPE inventory, consumption, and orders?                                                                  | <input type="checkbox"/>  Yes | <input type="checkbox"/>  No |

---

|                        |                          |                                  |
|------------------------|--------------------------|----------------------------------|
|                        | <input type="checkbox"/> | Internal facility staff          |
| The cleaning staff is: | <input type="checkbox"/> | External facility staff          |
|                        | <input type="checkbox"/> | Both internal and external staff |

---

|                                                                                                                                                                                                      |                          |                                                                                                             |
|------------------------------------------------------------------------------------------------------------------------------------------------------------------------------------------------------|--------------------------|-------------------------------------------------------------------------------------------------------------|
|                                                                                                                                                                                                      | <input type="checkbox"/> | No                                                                                                          |
| Have any members among healthcare personnel (nurses, healthcare assistants, physicians) currently received specific training related to COVID-19, in accordance with the facility's recommendations? | <input type="checkbox"/> | Yes, theoretical training (dedicated online courses, dedicated lessons)                                     |
|                                                                                                                                                                                                      | <input type="checkbox"/> | Yes, both theoretical and practical training (including simulations of PPE wearing and proper hand hygiene) |

---

|                                                                                                                                                                                               |                          |        |
|-----------------------------------------------------------------------------------------------------------------------------------------------------------------------------------------------|--------------------------|--------|
|                                                                                                                                                                                               | <input type="checkbox"/> | < 25%  |
| Percentage of the facility staff who have taken part in the training (physicians, nurses, healthcare assistants). [Supplementary question, depending on the answer to the previous question]. | <input type="checkbox"/> | 25-50% |
|                                                                                                                                                                                               | <input type="checkbox"/> | 51-75% |
|                                                                                                                                                                                               | <input type="checkbox"/> | >75%   |

---
